# Supplementary material for: Exploring genetic variability in FOXE1 through in silico approaches: new insights on UTR variants
Source: Research Square preprint supplement (doi:10.21203/rs.3.rs-7980581/v1), 2026-02-09
Supplement: Supplementary file 1 [file 68da1d89ca0f0a2ec80b3dda.docx]

**SUPPLEMENTAL MATERIAL**

**Exploring genetic variability in *FOXE1* through *in silico* approaches: new insights on UTR variants**

**Supplementary Table 1.** Algorithms used by bioinformatic tools.

| **Tool** | **Algorithm** | **Input** | **Output** | **Score** | **Reference** |
| --- | --- | --- | --- | --- | --- |
| PolyPhen-2 | Sequence-based prediction using a Naive Bayes classifier | Protein sequence, variant information | Probabilistic score (0 to 1) | Ranges from "Benign" to "Probably damaging" | Adzhubei et al., 2010 [33]. |
| SIFT | Sequence-based prediction using a position-specific scoring matrix (PSSM) | Protein sequence, variant information | Score (0 to 1), with <0.05 indicating "Damaging" | Ranges from 0 to 1 | Ng & Henikoff, 2003 [34][.](https://pubmed.ncbi.nlm.nih.gov/12823966/) |
| Phanter PSEP | Sequence-based prediction using a combination of various algorithms | Protein sequence, variant information | Probability score, pathogenicity prediction | Ranges from 0 to 1 | Tang et al. 2016 [35]. |
| MutPred2 | Uses structural and functional information to predict the impact of mutations | Protein sequence, variant information, 3D structures | Functional impact prediction, pathogenicity score | Ranges from 0 to 1 | Pejaver et al., 2017 [36]. |
| MetaSNP | Aggregates predictions from multiple SNP effect prediction tools | Protein sequence, variant information | Combined score, pathogenicity prediction | Ranges from 0 to 1 | Capriotti et al., 2013 [37]. |
| SNP&GO | Integrates functional annotations and sequence information | Protein sequence, variant information | Probability score, functional impact | Ranges from 0 to 1 | Calabrese et al., 2009 [38]. |
| PhD-SNP | Combines sequence and structural data using machine learning | Protein sequence, variant information | Probability of being pathogenic | Ranges from 0 to 1 | Calabrese et al., 2017 [39]. |
| PredictSNP | Uses a combination of prediction tools and machine learning | Protein sequence, variant information | Functional impact prediction, pathogenicity score | Ranges from 0 to 1 | Bendl et al., 2014 [40]. |
| HOPE | Analyzes the impact of mutations on protein structure and function | Protein sequence, variant information, 3D structures | Structural impact prediction | Qualitative assessment (e.g., "Benign", "Damaging") | Venselaar et al., 2010 [41]. |
| iMutant | Predicts changes in protein stability due to mutations | Protein sequence, variant information, 3D structures | Stability change prediction | Ranges from 0 to 1 | Capriotti et al., 2005 [42]. |
| RegulomeDB | Integrates data from various sources to predict regulatory potential (e.g., transcription factor binding sites, chromatin states) | Genomic coordinates, variant information | Regulatory potential with annotated evidence levels | Categorical score from 1 (likely regulatory) to 7 (minimal evidence) | Boyle et al., 2012 [43]. |
| RegVar | Analyzes eQTL data to assess the impact of variants on gene expression | Variant information, genomic coordinates | Association between variants and gene expression | P-values indicating the strength of association | Lu et al., 2023 [44]. |

**Supplementary Table 2.** Annotations and Functional Consequences of variants in the 5' UTR region of the *FOXE1* gene using UTRannotator plugin.

| **rsID** | **5UTR_annotation** | **5UTR_consequence** |
| --- | --- | --- |
| rs545190501 | Type: uORF; Cap Distance to Start: 178; Kozak Strength: Strong; Distance to CDS: 511; Evidence: NA; Distance to Stop: 36; Kozak Context: GGCATGG | 5_prime_UTR_premature_start_codon_loss_variant |
| rs1305296231 | Alt Type Length: 93; Ref Type: uORF; Kozak Context: GGCATGG; Evidence: NA; Kozak Strength: Strong; Ref Start Distance to CDS: 511; Ref Type Length: 39; Alt Type: uORF | 5_prime_UTR_uORF_frameshift_variant |
| rs900786273 | Ref Type: uORF; New STOP Distance to CDS: 496; Kozak Strength: Strong; Ref Start Distance to CDS: 511; Evidence: NA; Kozak Context: GGCATGG | 5_prime_UTR_uORF_stop_codon_gain_variant |
| rs914747730 | Kozak Context: GGCATGG; Evidence: NA; Ref Start Distance to CDS: 511; Kozak Strength: Strong; New STOP Distance to CDS: 481; Ref Type: uORF | 5_prime_UTR_uORF_stop_codon_gain_variant |
| rs1226791618 | Type: OutOfFrame oORF; Distance to CDS: 157; Distance to Stop: 522; Kozak Context: CGCATGC; Kozak Strength: Weak; Cap Distance to Start: 532 | 5_prime_UTR_premature_start_codon_gain_variant |
| rs1166470714 | Kozak Context: CAGATGG; Distance to Stop: 459; Distance to CDS: 94; Cap Distance to Start: 595; Kozak Strength: Moderate; Type: OutOfFrame oORF | 5_prime_UTR_premature_start_codon_g |


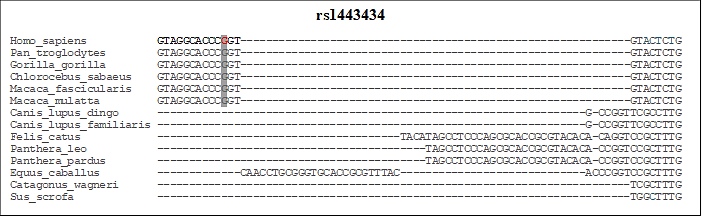


**Supplementary Figure 1.** Alignment of several species for the SNV rs1443434 in the UTR region of the *FOXE1* gene.


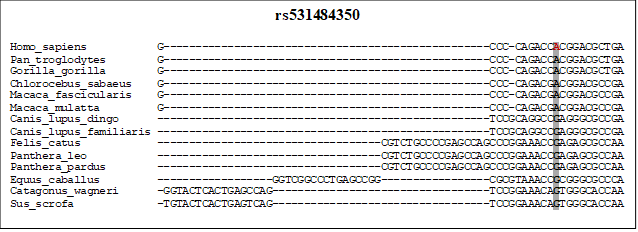


**Supplementary Figure 2**. Alignment of several species for the SNV rs531484350 in the UTR region of the *FOXE1* gene.


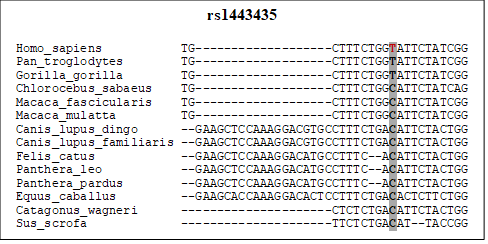


**Supplementary Figure 3.** Alignment of several species for the SNV rs1443435 in the UTR region of the *FOXE1* gene.


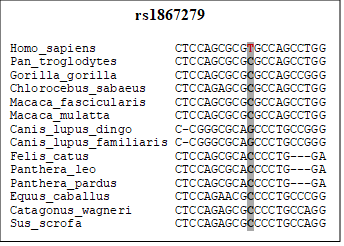


**Supplementary Figure 4.** Alignment of several species for the SNV rs1867279 in the UTR region of the *FOXE1* gene.

**
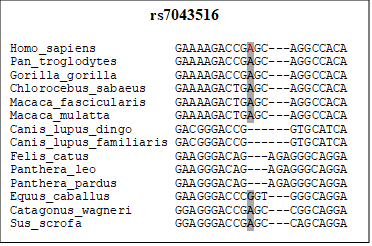
**

**Supplementary Figure 5.** Alignment of several species for the SNV rs7043516 in the UTR region *FOXE1* gene.


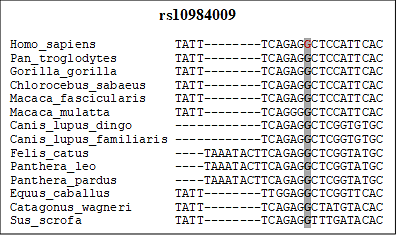


**Supplementary Figure 6**. Alignment of several species of the SNV rs10984009 in the UTR region *FOXE1* gene.


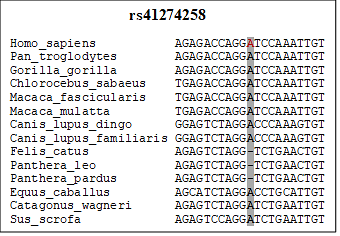


**Supplementary Figure 7**. Alignment of several species of the SNV rs41274258 in the UTR region *FOXE1* gene.


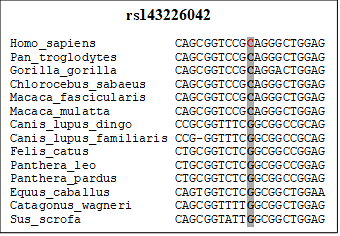


**Supplementary Figure 8**. Alignment of several species of the SNV rs143226042 in the UTR region *FOXE1* gene.


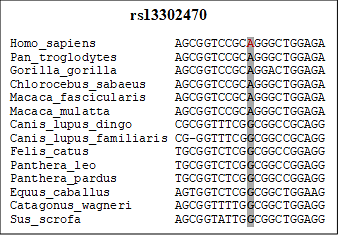


**Supplementary Figure 9**. Alignment of several species of the SNV rs13302470 in the UTR region *FOXE1* gene.


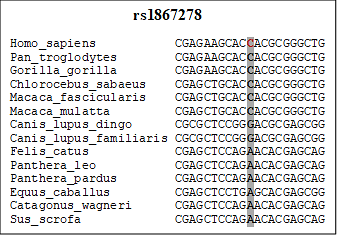


**Supplementary Figure 10**. Alignment of several species of the SNV rs1867278 in the UTR region *FOXE1* gene.


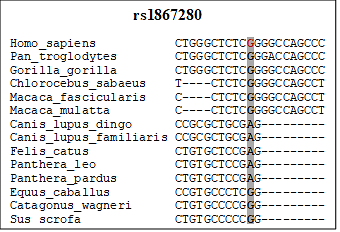


**Supplementary Figure 11**. Alignment of several species of the SNV rs1867280 in the UTR region *FOXE1* gene.


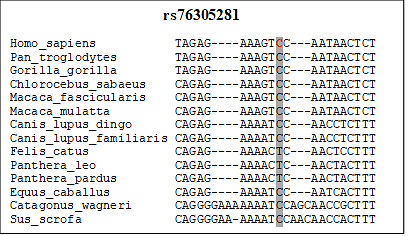


**Supplementary Figure 12**. Alignment of several species of the SNV rs76305281 in the UTR region *FOXE1* gene.
